# Supplementary material
Source: PubMed Central journal article supplement (PMC3816144)
Supplement: NIHMS521225-supplement-01.pdf [file NIHMS521225-supplement-01.pdf]

## Meta-Analysis of Lymphocytes in Schizophrenia: Clinical Status and Antipsychotic Effects

### Supplemental Information

**Table S1.** Studies of Immune Cell Parameters in Schizophrenia

| Study                               | Cell Subsets                                                                | Method                   | Antipsychotic | Location    | Included   | Patient Group(s)/Comment         |
|-------------------------------------|-----------------------------------------------------------------------------|--------------------------|---------------|-------------|------------|----------------------------------|
| <b>Achiron 1994 (17)</b>            | Lymphocytes, CD4%, CD8%                                                     | Flow cytometry           | No            | Israel      | <b>Yes</b> | <b>AR</b>                        |
| Arolt 1997 (18)                     | WBC, Lymphocytes, Monocytes, CD3%, CD4%<br>CD8%, CD19%                      | Flow cytometry           | No            | Germany     | No         | Clinical status not available    |
| <b>Baskak 2008 (19)</b>             | CD3%, CD4%, CD8%, CD4/CD8                                                   | Flow cytometry           | No            | Turkey      | <b>Yes</b> | <b>FEP; Treatment</b>            |
| <b>Billici 2003 (20)</b>            | CD3%, CD4%, CD8%, CD4/CD8, CD19%                                            | Flow cytometry           | Yes           | Turkey      | <b>Yes</b> | <b>Treatment</b>                 |
| <b>Carlton 2009 (21)</b>            | Monocytes                                                                   | Impedance cell counter   | No            | U.S.        | <b>Yes</b> | <b>FEP</b>                       |
| Cazzullo 1998 (22)                  | CD3, CD4, CD8, CD4/CD8, CD19                                                | Flow cytometry           | No            | Italy       | No         | Mean/SD not given                |
| Chang 2011 (23)                     | WBC, Lymphocytes                                                            | Impedance cell counter   | Unknown       | Taiwan      | No         | Clinical status not available    |
| <b>Coffey 1983 (24)</b>             | Lymphocytes                                                                 | Impedance cell counter   | Yes/No        | U.S.        | <b>Yes</b> | <b>AR</b>                        |
| Cosentino 1996 (25)                 | Lymphocytes, CD3%, CD4%, CD8%, CD4/CD8,<br>CD56%                            | Flow cytometry           | Yes           | Italy       | No         | Stratified data not available    |
| Craddock 2007 (26)                  | CD4, CD8                                                                    | Flow cytometry           | Yes/No        | U.K.        | No         | Clinical status not available    |
| DeLisi 1982 (27)                    | CD3%, CD4%, CD8%, CD56%                                                     | Flow cytometry           | Yes/No        | U.S.        | No         | Chronic inpatients               |
| Dimitrov 2011 (28)                  | Monocytes                                                                   | Impedance cell counter   | Yes           | U.S.        | No         | No control group                 |
| Dvorakova 1979 (29)                 | CD3%, CD19%                                                                 | Rosette formation        | Unknown       | Czech Repub | No         | Clinical status not available    |
| Ferguson 1978 (30)                  | CD3                                                                         | Rosette formation        | Yes/No        | U.S.        | No         | Clinical status not available    |
| Ganguli 1987 (31)                   | CD4, CD8                                                                    | Flow cytometry           | Yes           | U.S.        | No         | Mean/SD not given                |
| <b>Ganguli 1993 (32)</b>            | CD5, CD5%                                                                   | Flow cytometry           | Yes/No        | U.S.        | <b>Yes</b> | <b>AR/FEP</b>                    |
| <b>Henneberg 1990 (33)</b>          | CD4%, CD8%, CD4/CD8                                                         | Fluorescence microscopy  | Yes/No        | Germany     | <b>Yes</b> | <b>AR</b>                        |
| Hornberg 1995 (34)                  | WBC, CD4/CD8                                                                | Flow cytometry           | Yes           | Germany     | No         | Mean/SD not given                |
| Kaufman 1987 (35)                   | CD4/CD8                                                                     | Fluorescence microscopy  | Yes/No        | U.S.        | No         | Mean/SD not given                |
| Kolyaskina 1983 (36)                | CD3                                                                         | Rosette formation        | Unknown       | Russia      | No         | Mean/SD not given                |
| Kolyaskina 1987 (37)                | CD*                                                                         | Rosette formation        | Unknown       | Russia      | No         | Mean/SD not given                |
| <b>Maino 2007 (38)</b>              | CD3%, CD19%                                                                 | Flow cytometry           | No            | Germany     | No         | <b>AR; Treatment</b>             |
| <b>Masserini 1990 (39)</b>          | Lymphocytes, CD3, CD3%, CD4, CD4%, CD8<br>CD8%, CD19, CD19%                 | Microscopy               | Yes/No        | Italy       | <b>Yes</b> | <b>FEP</b>                       |
| Mazzarello 2004 (40)                | CD4, CD4%, CD8%, CD19%                                                      | Flow cytometry           | Yes           | Italy       | No         | Mean/SD not given                |
| McAllister 1989 (41)                | CD3%, CD4%, CD8%, CD4/CD8, CD19%                                            | Flow cytometry           | Yes           | U.S.        | No         | Clinical status not available    |
| <b>Muller 1991 (42)</b>             | CD3, CD3%, CD4, CD4%, CD8, CD8%, CD4/CD8                                    | Immunofluorescence assay | Yes/No        | Germany     | <b>Yes</b> | <b>AR; Treatment</b>             |
| Muller 1993 (43)                    | CD3, CD4, CD8                                                               | Immunofluorescence assay | Yes/No        | Germany     | No         | Population overlap (Muller 1991) |
| Muller 1998 (44)                    | CD8 gamma/delta                                                             | Flow cytometry           | No            | Germany     | No         | Clinical status not available    |
| Nikkila 1995 (45)                   | CSF CD4, CD8, CD4/CD8                                                       | Light microscopy         | Yes           | Finland     | No         | CSF                              |
| Nikkila 1999 (46)                   | CSF Monocytes                                                               | Light microscopy         | Yes           | Finland     | No         | CSF                              |
| Nikkila 2001 (47)                   | CSF Lymphocytes, Monocytes                                                  | Light microscopy         | Yes           | Finland     | No         | CSF                              |
| <b>Nyland 1980 (48)</b>             | Lymphocytes, CD3, CD3%, CD19, CD19%                                         | Rosette formation        | Yes           | Norway      | <b>Yes</b> | <b>AR; SO</b>                    |
| Printz 1999 (49)                    | CD3, CD3%, CD4%, CD5, CD5%, CD8%,<br>CD4/CD8, CD19, CD19%                   | Flow cytometry           | Yes/No        | U.S.        | No         | Clinical status not available    |
| Rabin 1988 (50)                     | Lymphocytes, CD4%, CD8%, CD4/CD8                                            | Not specified            | Unknown       | U.S.        | No         | Clinical status not available    |
| Rothermundt 1998 (51)               | WBC, Lymphocytes, Monocytes, CD3, CD19                                      | Flow cytometry           | No            | Germany     | No         | No control group                 |
| <b>Rudolf 2004 (52)</b>             | CD3, CD3%, CD4, CD4%, CD8, CD8%, CD4/CD8<br>CD19, CD19%, CD25%, CD56, CD56% | Flow cytometry           | Yes/No        | Germany     | <b>Yes</b> | <b>AR</b>                        |
| <b>Sasaki 1994 (53)</b>             | WBC, Lymphocytes, CD3%, CD4%, CD8%,<br>CD4/CD8, CD25%, CD56%                | Flow cytometry           | Yes           | Japan       | <b>Yes</b> | <b>AR; Treatment</b>             |
| Schattner 1996 (54)                 | CD4, CD8, CD4/CD8                                                           | Flow cytometry           | Unknown       | Israel      | No         | Stratified data not available    |
| Schleifer 1985 (55)                 | Lymphocytes, CD3, CD3%, CD19, CD19%                                         | Rosette formation        | Unknown       | U.S.        | No         | Stratified data not available    |
| <b>Sperner-Unterweger 1999 (56)</b> | WBC, Lymphocytes, CD3, CD4, CD8, CD4/CD8,<br>CD56                           | Flow cytometry           | Yes/No        | Austria     | <b>Yes</b> | <b>AR; FEP; Treatment</b>        |
| <b>Steiner 2010 (16)</b>            | CD3, CD4, CD8, CD4/CD8, CD19, CD56                                          | Flow cytometry           | Yes/No        | Germany     | <b>Yes</b> | <b>AR; Treatment</b>             |
| <b>Theodoropoulou 2001 (57)</b>     | CD3%, CD4%, CD8%, CD4/CD8, CD19%, CD25%                                     | Flow cytometry           | Yes/No        | Greece      | <b>Yes</b> | <b>FEP; SO</b>                   |
| Torres 2009 (58)                    | Monocytes, CD4, CD19, CD56                                                  | Flow cytometry           | Yes           | Brazil      | No         | Clinical status not available    |
| Vartanian 1978 (59)                 | CD3%                                                                        | Rosette formation        | Unknown       | Russia      | No         | Clinical status not available    |

| Study               | Cell Subsets                | Method                 | Antipsychotic | Location | Included | Patient Group(s)/Comment      |
|---------------------|-----------------------------|------------------------|---------------|----------|----------|-------------------------------|
| Villemain 1989 (60) | CD4%, CD8%, CD4/CD8         | Rosette formation      | No            | France   | No       | Clinical status not available |
| Wahlbeck 2000 (61)  | CSF Monocytes               | Light microscopy       | Yes           | Finland  | No       | No control group              |
| Wilke 1996 (62)     | WBC, Monocytes              | Flow cytometry         | Yes           | Germany  | No       | Stratified data not available |
| Zarrabi 1979 (63)   | CD3%, CD19%                 | Rosette formation      | Yes           | U.S.     | No       | Mean/SD not given             |
| Zorrilla 1996 (64)  | WBC, Lymphocytes, Monocytes | Impedance cell counter | Yes/No        | U.S.     | No       | Clinical status not available |
| Zorrilla 1998 (65)  | Lymphocytes                 | Impedance cell counter | Yes           | U.S.     | No       | Mean/SD not given             |

All reference numbers refer to those in the main text. See main text for full reference details.

Studies that were included are indicated by **bold** font.

AR, acutely relapsed inpatients; CSF, cerebrospinal fluid; FEP, first-episode psychosis; SO, stable medicated outpatients; WBC, white blood cell.

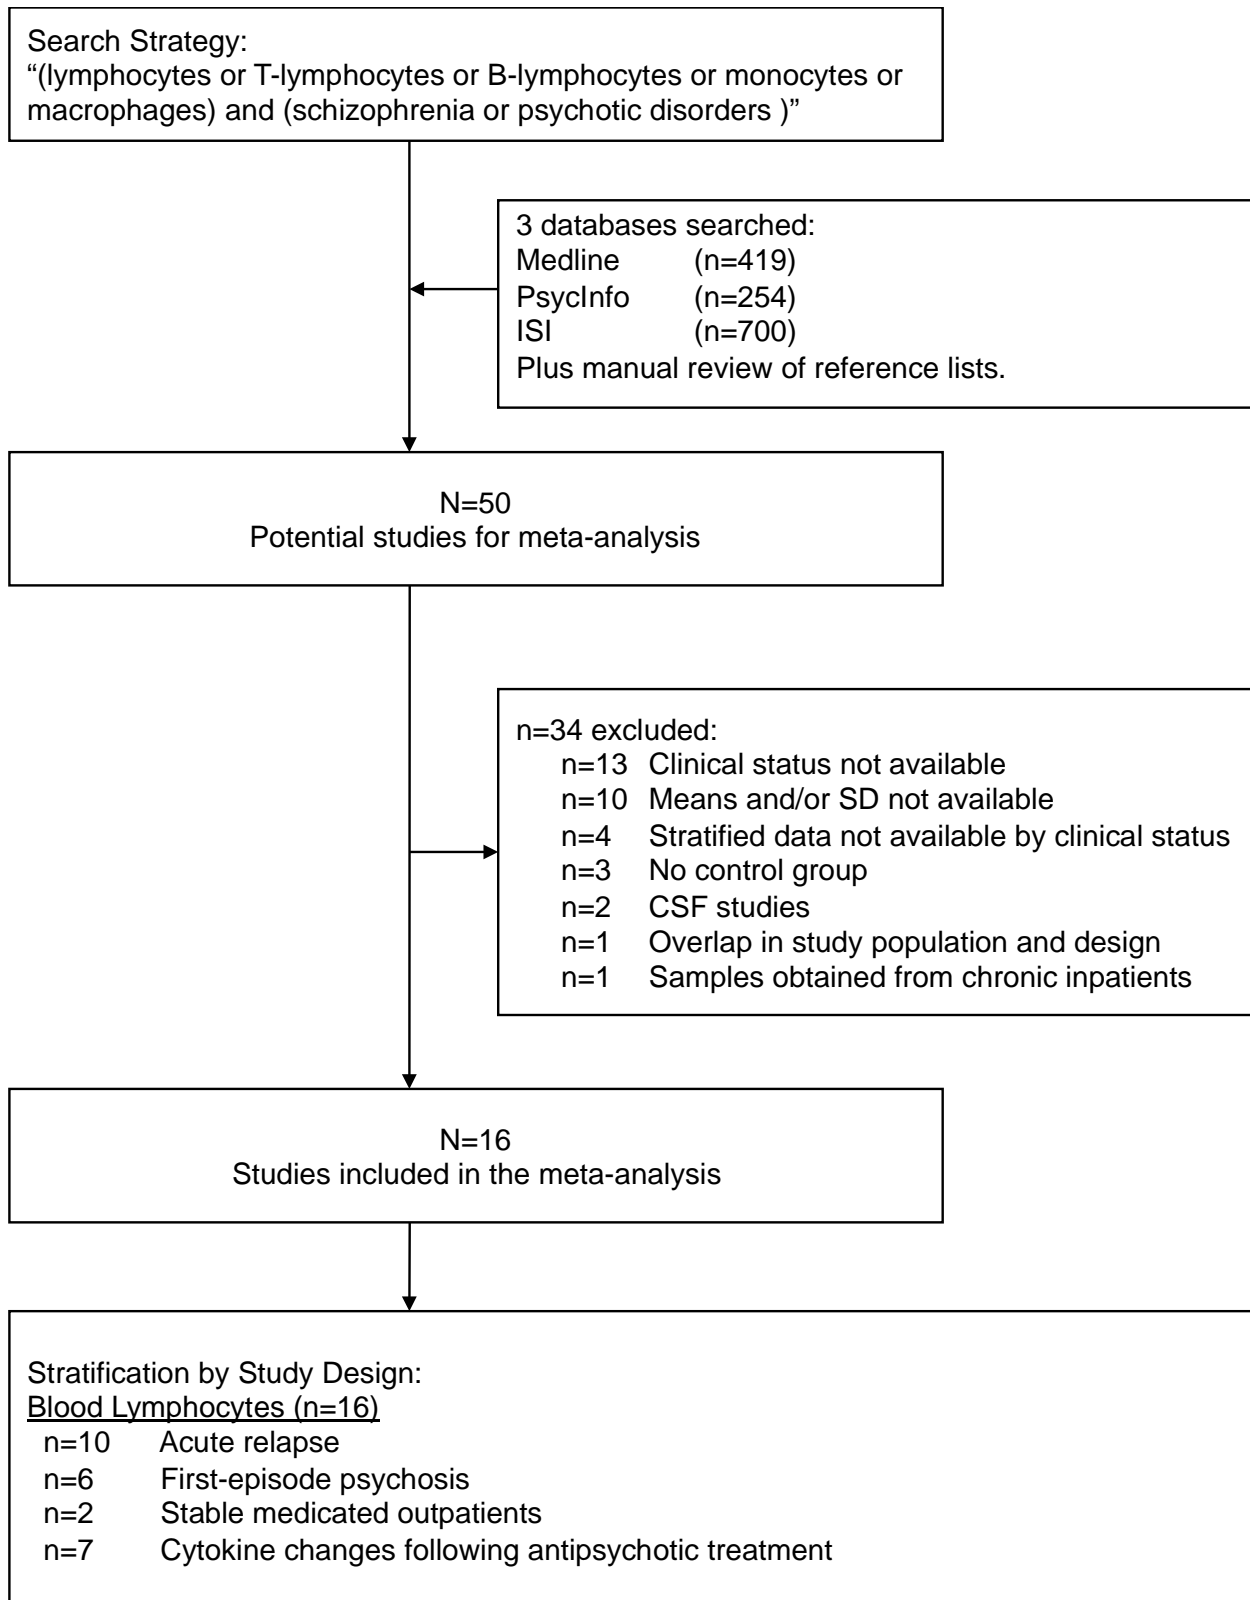

**Figure S1.** Flow chart of the study selection process. CSF, cerebrospinal fluid.

**Table S2.** Effect size estimates for individual immune parameters

| Study                   | Schizophrenia |    |      | Control |     |      | Hedges <i>g</i> | 95% CI |       | Subset  | Notes | Clinical Status |
|-------------------------|---------------|----|------|---------|-----|------|-----------------|--------|-------|---------|-------|-----------------|
|                         | Mean          | N  | SD   | Mean    | N   | SD   |                 | Lower  | Upper |         |       |                 |
| Achiron 1994            | 33.5          | 16 | 9.0  | 38.6    | 16  | 11.9 | -0.47           | -1.17  | 0.23  | CD4%    | Blood | AR              |
| Achiron 1994            | 28.8          | 16 | 15.3 | 24.5    | 16  | 6.1  | 0.36            | -0.34  | 1.06  | CD8%    | Blood | AR              |
| Achiron 1994            | 2167          | 16 | 1054 | 1034    | 16  | 8980 | 0.17            | -0.52  | 0.87  | Lymphs  | Blood | AR              |
| Coffey 1983             | 2689          | 33 | 1086 | 2119    | 15  | 995  | 0.53            | -0.09  | 1.15  | Lymphs  | Blood | AR              |
| Ganguli 1993            | 207           | 29 | 155  | 176     | 166 | 129  | 0.23            | -0.17  | 0.62  | CD19    | Blood | AR              |
| Henneberg 1990          | 1.80          | 30 | 1.10 | 1.80    | 30  | 0.70 | 0.00            | -0.51  | 0.51  | CD4/CD8 | Blood | AR              |
| Henneberg 1990          | 40.3          | 30 | 13.5 | 33.8    | 30  | 8.6  | 0.57            | 0.05   | 1.08  | CD4%    | Blood | AR              |
| Henneberg 1990          | 28.9          | 30 | 18.5 | 21.6    | 30  | 8.6  | 0.50            | -0.01  | 1.01  | CD8%    | Blood | AR              |
| Maino 2007              | 12.4          | 40 | 4.4  | 10.5    | 20  | 2.9  | 0.47            | -0.07  | 1.02  | CD19%   | Blood | AR              |
| Maino 2007              | 66.3          | 40 | 8.0  | 70.7    | 20  | 5.1  | -0.60           | -1.15  | -0.06 | CD3%    | Blood | AR              |
| Muller 1991             | 1324          | 51 | 551  | 1016    | 38  | 457  | 0.59            | 0.17   | 1.02  | CD3     | Blood | AR              |
| Muller 1991             | 54.0          | 51 | 11.0 | 45.0    | 38  | 12.0 | 0.78            | 0.34   | 1.22  | CD3%    | Blood | AR              |
| Muller 1991             | 882           | 51 | 409  | 697     | 38  | 312  | 0.49            | 0.07   | 0.92  | CD4     | Blood | AR              |
| Muller 1991             | 1.83          | 51 | 0.77 | 1.52    | 38  | 0.62 | 0.43            | 0.01   | 0.86  | CD4/CD8 | Blood | AR              |
| Muller 1991             | 36.0          | 51 | 10.0 | 31.0    | 38  | 9.0  | 0.52            | 0.09   | 0.94  | CD4%    | Blood | AR              |
| Muller 1991             | 498           | 51 | 218  | 517     | 38  | 248  | -0.08           | -0.50  | 0.34  | CD8     | Blood | AR              |
| Muller 1991             | 21.0          | 51 | 6.0  | 22.0    | 38  | 7.0  | -0.15           | -0.57  | 0.27  | CD8%    | Blood | AR              |
| Nyland 1980             | 598           | 12 | 319  | 580     | 30  | 246  | 0.07            | -0.60  | 0.74  | CD19    | Blood | AR              |
| Nyland 1980             | 25.0          | 12 | 13.9 | 26.0    | 30  | 11.0 | -0.08           | -0.75  | 0.59  | CD19%   | Blood | AR              |
| Nyland 1980             | 1238          | 27 | 462  | 1538    | 30  | 860  | -0.42           | -0.95  | 0.10  | CD3     | Blood | AR              |
| Nyland 1980             | 60.0          | 27 | 10.4 | 66.0    | 30  | 5.5  | -0.72           | -1.26  | -0.19 | CD3%    | Blood | AR              |
| Nyland 1980             | 2079          | 27 | 675  | 2330    | 30  | 707  | -0.36           | -0.88  | 0.17  | Lymphs  | Blood | AR              |
| Rudolf 2004             | 208           | 31 | 85   | 228     | 31  | 81   | -0.24           | -0.74  | 0.26  | CD19    | Blood | AR              |
| Rudolf 2004             | 12.5          | 31 | 4.8  | 14.1    | 31  | 4.3  | -0.35           | -0.85  | 0.15  | CD19%   | Blood | AR              |
| Rudolf 2004             | 9.4           | 31 | 3.9  | 10.6    | 31  | 3.9  | -0.30           | -0.80  | 0.20  | CD25%   | Blood | AR              |
| Rudolf 2004             | 1207          | 31 | 325  | 1214    | 31  | 294  | -0.02           | -0.52  | 0.48  | CD3     | Blood | AR              |
| Rudolf 2004             | 72.1          | 31 | 7.4  | 73.5    | 31  | 5.1  | -0.22           | -0.72  | 0.28  | CD3%    | Blood | AR              |
| Rudolf 2004             | 770           | 31 | 245  | 809     | 31  | 263  | -0.15           | -0.65  | 0.35  | CD4     | Blood | AR              |
| Rudolf 2004             | 2.80          | 31 | 1.90 | 2.40    | 31  | 1.80 | 0.21            | -0.29  | 0.71  | CD4/CD8 | Blood | AR              |
| Rudolf 2004             | 47.6          | 31 | 9.5  | 48.8    | 31  | 8.7  | -0.13           | -0.63  | 0.37  | CD4%    | Blood | AR              |
| Rudolf 2004             | 215           | 31 | 137  | 156     | 31  | 73   | 0.53            | 0.02   | 1.04  | CD56    | Blood | AR              |
| Rudolf 2004             | 12.1          | 31 | 6.5  | 9.4     | 31  | 3.3  | 0.52            | 0.01   | 1.02  | CD56%   | Blood | AR              |
| Rudolf 2004             | 361           | 31 | 152  | 352     | 31  | 116  | 0.07            | -0.43  | 0.56  | CD8     | Blood | AR              |
| Rudolf 2004             | 21.5          | 31 | 8.4  | 21.5    | 31  | 5.7  | 0.00            | -0.50  | 0.50  | CD8%    | Blood | AR              |
| Rudolf 2004             | 1682          | 31 | 419  | 1650    | 31  | 369  | 0.08            | -0.42  | 0.58  | Lymphs  | Blood | AR              |
| Sasaki 1994             | 2.5           | 14 | 3.0  | 1.5     | 20  | 1.5  | 0.44            | -0.25  | 1.13  | CD25%   | Blood | AR              |
| Sasaki 1994             | 70.9          | 14 | 7.4  | 73.9    | 20  | 5.9  | -0.45           | -1.14  | 0.24  | CD3%    | Blood | AR              |
| Sasaki 1994             | 1.79          | 14 | 0.70 | 1.52    | 20  | 0.41 | 0.48            | -0.21  | 1.17  | CD4/CD8 | Blood | AR              |
| Sasaki 1994             | 44.5          | 14 | 6.4  | 41.6    | 20  | 5.7  | 0.47            | -0.22  | 1.16  | CD4%    | Blood | AR              |
| Sasaki 1994             | 13.3          | 14 | 5.4  | 6.7     | 20  | 2.9  | 1.57            | 0.79   | 2.35  | CD56%   | Blood | AR              |
| Sasaki 1994             | 27.1          | 14 | 6.6  | 28.6    | 20  | 5.2  | -0.25           | -0.94  | 0.43  | CD8%    | Blood | AR              |
| Sasaki 1994             | 1759          | 14 | 416  | 2152    | 20  | 497  | -0.82           | -1.53  | -0.11 | Lymphs  | Blood | AR              |
| Sasaki 1994             | 6.2           | 14 | 1.5  | 5.8     | 20  | 1.1  | 0.33            | -0.36  | 1.02  | WBC     | Blood | AR              |
| Sperner-Unterweger 1999 | 1585          | 34 | 577  | 1496    | 16  | 514  | 0.16            | -0.44  | 0.75  | CD3     | Blood | AR              |
| Sperner-Unterweger 1999 | 1067          | 34 | 432  | 888     | 16  | 288  | 0.45            | -0.15  | 1.05  | CD4     | Blood | AR              |
| Sperner-Unterweger 1999 | 2.34          | 34 | 1.42 | 1.69    | 16  | 0.71 | 0.51            | -0.09  | 1.12  | CD4/CD8 | Blood | AR              |
| Sperner-Unterweger 1999 | 224           | 34 | 139  | 352     | 16  | 204  | -0.78           | -1.39  | -0.16 | CD56    | Blood | AR              |
| Sperner-Unterweger 1999 | 520           | 34 | 249  | 595     | 16  | 280  | -0.28           | -0.88  | 0.31  | CD8     | Blood | AR              |
| Sperner-Unterweger 1999 | 2148          | 34 | 681  | 2121    | 16  | 649  | 0.04            | -0.55  | 0.63  | Lymphs  | Blood | AR              |
| Sperner-Unterweger 1999 | 7.8           | 34 | 1.9  | 6.5     | 16  | 1.7  | 0.70            | 0.09   | 1.31  | WBC     | Blood | AR              |
| Steiner 2010            | 300           | 26 | 238  | 195     | 32  | 109  | 0.58            | 0.05   | 1.11  | CD19    | Blood | AR              |
| Steiner 2010            | 1211          | 26 | 503  | 1396    | 32  | 532  | -0.35           | -0.87  | 0.17  | CD3     | Blood | AR              |
| Steiner 2010            | 710           | 26 | 295  | 973     | 32  | 396  | -0.73           | -1.27  | -0.20 | CD4     | Blood | AR              |
| Steiner 2010            | 1.03          | 26 | 0.60 | 1.45    | 32  | 0.56 | -0.72           | -1.25  | -0.18 | CD4/CD8 | Blood | AR              |
| Steiner 2010            | 540           | 26 | 221  | 396     | 32  | 170  | 0.73            | 0.20   | 1.26  | CD56    | Blood | AR              |
| Steiner 2010            | 332           | 26 | 199  | 410     | 32  | 177  | -0.41           | -0.93  | 0.11  | CD8     | Blood | AR              |
| Baskak 2008             | 69.4          | 11 | 5.9  | 72.8    | 14  | 6.2  | -0.54           | -1.35  | 0.26  | CD3%    | Blood | FEP             |
| Baskak 2008             | 1.60          | 11 | 0.40 | 1.40    | 14  | 0.30 | 0.56            | -0.25  | 1.36  | CD4/CD8 | Blood | FEP             |
| Baskak 2008             | 41.7          | 11 | 7.1  | 41.8    | 14  | 6.8  | -0.01           | -0.80  | 0.78  | CD4%    | Blood | FEP             |
| Baskak 2008             | 25.8          | 11 | 5.1  | 30.9    | 14  | 6.8  | -0.81           | -1.63  | 0.01  | CD8%    | Blood | FEP             |
| Ganguli 1993            | 195           | 23 | 135  | 176     | 166 | 129  | 0.14            | -0.29  | 0.58  | CD19    | Blood | FEP             |

Table S2. (continued)

| Study                   | Schizophrenia |    |      | Control        |    |      | Hedges <i>g</i> | 95% CI |       | Subset  | Notes     | Clinical Status |
|-------------------------|---------------|----|------|----------------|----|------|-----------------|--------|-------|---------|-----------|-----------------|
|                         | Mean          | N  | SD   | Mean           | N  | SD   |                 | Lower  | Upper |         |           |                 |
| Masserini 1990          | 368           | 7  | 116  | 268            | 37 | 112  | 0.87            | 0.04   | 1.70  | CD19    | Blood     | FEP             |
| Masserini 1990          | 1587          | 7  | 696  | 1214           | 37 | 406  | 0.80            | -0.03  | 1.62  | CD3     | Blood     | FEP             |
| Masserini 1990          | 69.0          | 7  | 10.0 | 64.0           | 37 | 9.0  | 0.54            | -0.28  | 1.35  | CD3%    | Blood     | FEP             |
| Masserini 1990          | 1200          | 7  | 432  | 833            | 37 | 274  | 1.19            | 0.35   | 2.04  | CD4     | Blood     | FEP             |
| Masserini 1990          | 44.0          | 7  | 9.0  | 43.0           | 37 | 6.0  | 0.15            | -0.66  | 0.96  | CD4%    | Blood     | FEP             |
| Masserini 1990          | 867           | 7  | 351  | 649            | 37 | 208  | 0.91            | 0.08   | 1.74  | CD8     | Blood     | FEP             |
| Masserini 1990          | 38.0          | 7  | 8.0  | 31.0           | 37 | 6.0  | 1.08            | 0.25   | 1.92  | CD8%    | Blood     | FEP             |
| Masserini 1990          | 2251          | 7  | 717  | 1958           | 37 | 62   | 1.04            | 0.20   | 1.87  | Lymphs  | Blood     | FEP             |
| Sperner-Unterweger 1999 | 1967          | 21 | 784  | 1496           | 16 | 514  | 0.68            | 0.01   | 1.34  | CD3     | Blood     | FEP             |
| Sperner-Unterweger 1999 | 1165          | 21 | 496  | 888            | 16 | 288  | 0.65            | -0.02  | 1.31  | CD4     | Blood     | FEP             |
| Sperner-Unterweger 1999 | 2.27          | 21 | 1.21 | 1.69           | 16 | 0.71 | 0.55            | -0.11  | 1.22  | CD4/CD8 | Blood     | FEP             |
| Sperner-Unterweger 1999 | 649           | 21 | 421  | 595            | 16 | 280  | 0.14            | -0.51  | 0.79  | CD8     | Blood     | FEP             |
| Sperner-Unterweger 1999 | 2736          | 21 | 1216 | 2121           | 16 | 649  | 0.59            | -0.07  | 1.26  | Lymphs  | Blood     | FEP             |
| Theodoropoulou 2001     | 64.0          | 53 | 6.0  | 68.0           | 60 | 11.0 | -0.44           | -0.81  | -0.07 | CD3%    | Blood     | FEP             |
| Theodoropoulou 2001     | 40.0          | 52 | 8.0  | 40.0           | 60 | 8.0  | 0.00            | -0.37  | 0.37  | CD4%    | Blood     | FEP             |
| Theodoropoulou 2001     | 26.0          | 52 | 16.0 | 27.0           | 60 | 7.0  | -0.08           | -0.45  | 0.29  | CD8%    | Blood     | FEP             |
| Nyland 1980             | 67.0          | 10 | 9.5  | 66.0           | 30 | 5.5  | 0.15            | -0.57  | 0.86  | CD3%    | Blood     | SO              |
| Theodoropoulou 2001     | 61.0          | 29 | 11.0 | 68.0           | 60 | 11.0 | -0.63           | -1.08  | -0.18 | CD3%    | Blood     | SO              |
| Study                   | Pre-Treatment |    |      | Post-Treatment |    |      | Hedges <i>g</i> | 95% CI |       | Subset  | Notes     | Clinical Status |
|                         | Mean          | N  | SD   | Mean           | N  | SD   |                 | Lower  | Upper |         |           |                 |
| Billici 2003            | 11.9          | 20 | 2.7  | 12.1           | 20 | 1.1  | -0.09           | -0.71  | 0.53  | CD19%   | Treatment | AR              |
| Maino 2007              | 12.4          | 40 | 4.4  | 9.6            | 11 | 3.4  | 0.65            | -0.03  | 1.33  | CD19%   | Treatment | AR              |
| Muller 1991             | 1324          | 51 | 551  | 1523           | 26 | 636  | -0.34           | -0.81  | 0.14  | CD3     | Treatment | AR              |
| Sperner-Unterweger 1999 | 1585          | 34 | 577  | 1662           | 16 | 647  | -0.13           | -0.72  | 0.47  | CD3     | Treatment | AR              |
| Steiner 2010            | 1063          | 11 | 612  | 1425           | 11 | 608  | -0.56           | -1.42  | 0.29  | CD3     | Treatment | AR              |
| Billici 2003            | 65.1          | 20 | 7.4  | 61.8           | 20 | 3.4  | 0.57            | -0.06  | 1.20  | CD3%    | Treatment | AR              |
| Maino 2007              | 66.3          | 40 | 8.0  | 67.8           | 11 | 6.9  | -0.19           | -0.86  | 0.48  | CD3%    | Treatment | AR              |
| Muller 1991             | 54.0          | 51 | 11.0 | 58.0           | 26 | 9.0  | -0.38           | -0.86  | 0.09  | CD3%    | Treatment | AR              |
| Sasaki 1994             | 70.9          | 14 | 7.4  | 75.6           | 14 | 6.3  | -0.66           | -1.42  | 0.10  | CD3%    | Treatment | AR              |
| Muller 1991             | 882           | 51 | 409  | 1012           | 26 | 448  | -0.30           | -0.78  | 0.17  | CD4     | Treatment | AR              |
| Sperner-Unterweger 1999 | 1067          | 34 | 432  | 1122           | 16 | 447  | -0.13           | -0.72  | 0.47  | CD4     | Treatment | AR              |
| Steiner 2010            | 621           | 11 | 358  | 956            | 11 | 392  | -0.85           | -1.72  | 0.03  | CD4     | Treatment | AR              |
| Billici 2003            | 1.36          | 20 | 0.22 | 1.20           | 20 | 0.10 | 0.92            | 0.27   | 1.57  | CD4/CD8 | Treatment | AR              |
| Muller 1991             | 1.83          | 51 | 0.77 | 1.83           | 32 | 0.89 | 0.00            | -0.44  | 0.44  | CD4/CD8 | Treatment | AR              |
| Sasaki 1994             | 1.79          | 14 | 0.70 | 1.54           | 14 | 0.39 | 0.43            | -0.32  | 1.18  | CD4/CD8 | Treatment | AR              |
| Sperner-Unterweger 1999 | 2.34          | 34 | 1.42 | 2.32           | 16 | 1.39 | 0.01            | -0.58  | 0.61  | CD4/CD8 | Treatment | AR              |
| Billici 2003            | 34.7          | 20 | 4.8  | 35.7           | 20 | 3.2  | -0.24           | -0.86  | 0.38  | CD4%    | Treatment | AR              |
| Muller 1991             | 36.0          | 51 | 10.0 | 39.0           | 26 | 9.0  | -0.31           | -0.78  | 0.17  | CD4%    | Treatment | AR              |
| Sasaki 1994             | 44.5          | 14 | 6.4  | 43.7           | 14 | 6.3  | 0.12            | -0.62  | 0.86  | CD4%    | Treatment | AR              |
| Sperner-Unterweger 1999 | 224           | 34 | 139  | 380            | 16 | 187  | -0.99           | -1.61  | -0.36 | CD56    | Treatment | AR              |
| Steiner 2010            | 461           | 11 | 261  | 496            | 11 | 314  | -0.12           | -0.95  | 0.72  | CD56    | Treatment | AR              |
| Billici 2003            | 11.2          | 20 | 2.8  | 12.3           | 20 | 1.7  | -0.48           | -1.11  | 0.15  | CD56%   | Treatment | AR              |
| Sasaki 1994             | 13.3          | 14 | 5.4  | 10.7           | 14 | 4.3  | 0.52            | -0.24  | 1.27  | CD56%   | Treatment | AR              |
| Muller 1991             | 498           | 51 | 218  | 637            | 26 | 313  | -0.54           | -1.02  | -0.06 | CD8     | Treatment | AR              |
| Sperner-Unterweger 1999 | 520           | 34 | 249  | 557            | 16 | 291  | -0.14           | -0.73  | 0.46  | CD8     | Treatment | AR              |
| Steiner 2010            | 280           | 11 | 254  | 492            | 11 | 259  | -0.78           | -1.65  | 0.08  | CD8     | Treatment | AR              |
| Billici 2003            | 25.4          | 20 | 5.6  | 29.6           | 20 | 4.4  | -0.82           | -1.46  | -0.17 | CD8%    | Treatment | AR              |
| Muller 1991             | 21.0          | 51 | 6.0  | 24.0           | 26 | 7.0  | -0.47           | -0.95  | 0.01  | CD8%    | Treatment | AR              |
| Sasaki 1994             | 27.1          | 14 | 6.6  | 28.1           | 14 | 4.3  | -0.17           | -0.92  | 0.57  | CD8%    | Treatment | AR              |
| Sasaki 1994             | 1759          | 14 | 416  | 1473           | 14 | 265  | 0.79            | 0.02   | 1.56  | Lymphs  | Treatment | AR              |
| Sperner-Unterweger 1999 | 2148          | 34 | 681  | 2290           | 16 | 762  | -0.20           | -0.79  | 0.40  | Lymphs  | Treatment | AR              |
| Sasaki 1994             | 6.2           | 14 | 1.5  | 5.3            | 14 | 1.1  | 0.67            | -0.09  | 1.44  | WBC     | Treatment | AR              |
| Sperner-Unterweger 1999 | 7.8           | 34 | 1.9  | 7.7            | 16 | 2.6  | 0.06            | -0.54  | 0.65  | WBC     | Treatment | AR              |

**Table S2.** (continued)

| Study                   | Pre-Treatment |    |      | Post-Treatment |    |      | Hedges <i>g</i> | 95% CI |       | Subset  | Notes     | Clinical Status |
|-------------------------|---------------|----|------|----------------|----|------|-----------------|--------|-------|---------|-----------|-----------------|
|                         | Mean          | N  | SD   | Mean           | N  | SD   |                 | Lower  | Upper |         |           |                 |
| Sperner-Unterweger 1999 | 1967          | 21 | 784  | 1614           | 16 | 375  | 0.54            | -0.12  | 1.20  | CD3     | Treatment | FEP             |
| Baskak 2008             | 70.6          | 10 | 6.4  | 75.9           | 10 | 3.5  | -0.98           | -1.90  | -0.05 | CD3%    | Treatment | FEP             |
| Sperner-Unterweger 1999 | 1165          | 21 | 496  | 1008           | 16 | 254  | 0.38            | -0.28  | 1.03  | CD4     | Treatment | FEP             |
| Baskak 2008             | 1.60          | 10 | 0.50 | 1.50           | 10 | 0.50 | 0.19            | -0.69  | 1.07  | CD4/CD8 | Treatment | FEP             |
| Sperner-Unterweger 1999 | 2.27          | 21 | 1.21 | 1.88           | 16 | 0.78 | 0.36            | -0.29  | 1.02  | CD4/CD8 | Treatment | FEP             |
| Baskak 2008             | 42.7          | 10 | 8.5  | 43.8           | 10 | 7.4  | -0.13           | -1.01  | 0.75  | CD4%    | Treatment | FEP             |
| Sperner-Unterweger 1999 | 327           | 21 | 224  | 447            | 16 | 354  | -0.41           | -1.07  | 0.25  | CD56    | Treatment | FEP             |
| Sperner-Unterweger 1999 | 649           | 21 | 421  | 632            | 16 | 326  | 0.04            | -0.61  | 0.69  | CD8     | Treatment | FEP             |
| Baskak 2008             | 26.5          | 10 | 5.6  | 30.7           | 10 | 6.1  | -0.68           | -1.58  | 0.22  | CD8%    | Treatment | FEP             |
| Sperner-Unterweger 1999 | 2736          | 21 | 1216 | 2163           | 16 | 529  | 0.57            | -0.09  | 1.23  | Lymphs  | Treatment | FEP             |
| Sperner-Unterweger 1999 | 8.1           | 21 | 2.1  | 7.2            | 16 | 1.9  | 0.42            | -0.23  | 1.08  | WBC     | Treatment | FEP             |

AR, acutely relapsed inpatients; EP, first-episode psychosis; SO, stable medicated outpatients; WBC, white blood cell.



## Following Antipsychotic Treatment for Acute Exacerbation of Psychosis

| Parameter   | Studies | N   |         | Mean             | Mean ES | 95% CI | p-value | Heterogeneity   |         | I <sup>2</sup> | References |                    |
|-------------|---------|-----|---------|------------------|---------|--------|---------|-----------------|---------|----------------|------------|--------------------|
|             |         | Pt  | Control | Duration (weeks) |         |        |         | χ <sup>2</sup>  | p-value |                |            |                    |
| WBC         | 3       | 69  | 46      | 3                | -0.34   | -0.72  | 0.05    | 0.09            | 1.67    | 0.43           | 0.0        | 53, 56             |
| Lymphocytes | 3       | 69  | 46      | 3                | -0.31   | -0.69  | 0.08    | 0.12            | 4.89    | 0.09           | 59.1       | 53, 56             |
| CD3         | 4       | 117 | 69      | 7                | 0.13    | -0.17  | 0.43    | 0.41            | 5.65    | 0.13           | 46.9       | 16, 42, 56         |
| CD3%        | 5       | 135 | 81      | 11               | 0.25    | -0.04  | 0.53    | 0.10            | 10.30   | <b>0.04</b>    | 61.2       | 19, 20, 38, 42, 53 |
| CD4         | 4       | 117 | 69      | 7                | 0.18    | -0.12  | 0.48    | 0.25            | 5.31    | 0.15           | 43.5       | 16, 42, 56         |
| CD4%        | 4       | 95  | 70      | 11               | 0.19    | -0.12  | 0.51    | 0.23            | 0.96    | 0.81           | 0.0        | 19, 20, 42, 53     |
| CD8         | 4       | 117 | 69      | 7                | 0.34    | 0.04   | 0.64    | <b>0.03</b>     | 3.46    | 0.33           | 13.3       | 16, 42, 56         |
| CD8%        | 4       | 95  | 70      | 11               | 0.53    | 0.21   | 0.85    | <b>&lt;0.01</b> | 1.82    | 0.61           | 0.0        | 19, 20, 42, 53     |
| CD4/CD8     | 6       | 150 | 108     | 8                | -0.26   | -0.51  | -0.01   | <b>0.05</b>     | 6.21    | 0.29           | 19.5       | 19, 20, 42, 53, 56 |
| CD19        |         |     |         |                  |         |        |         |                 |         |                |            |                    |
| CD19%       | 2       | 60  | 31      | 12               | 0.25    | -0.21  | 0.70    | 0.29            | 2.55    | 0.11           | 60.7       | 20, 38             |
| CD25%       |         |     |         |                  |         |        |         |                 |         |                |            |                    |
| CD56        | 3       | 66  | 43      | 3                | 0.58    | 0.18   | 0.98    | <b>&lt;0.01</b> | 3.07    | 0.22           | 34.9       | 16, 56             |
| CD56%       | 2       | 34  | 34      | 10               | -0.07   | -0.55  | 0.41    | 0.78            | 3.95    | <b>0.05</b>    | 74.7       | 20, 53             |

All reference numbers refer to those in the main text. See main text for full reference details.  
 CI, confidence interval; ES, effect size; Pt, patient; WBC, white blood cell.
